# Supplementary material for: Sex Ratio Meiotic Drive as a Plausible Evolutionary Mechanism for Hybrid Male Sterility
Source: PubMed Central journal article supplement (PMC4379000; doi:10.1371/journal.pgen.1005073), 2015-03-30
Supplement: pgen.1005073.s016.pdf [file pgen.1005073.s016.pdf]

S3 Table. Summary of QTL mappings: Exp2

| Analysis and method |               |           | Chr.                    | QTL           | CIM      |                   |                   |        |                    | MIM      |      |        |                    |                    |       |      |      |
|---------------------|---------------|-----------|-------------------------|---------------|----------|-------------------|-------------------|--------|--------------------|----------|------|--------|--------------------|--------------------|-------|------|------|
| Phenotype           | LOD threshold | Map. pop. |                         |               | Position | CI-L <sup>1</sup> | CI-R <sup>1</sup> | Effect | H <sup>2</sup> (%) | Position | LOD  | Effect | H <sup>2</sup> (%) | h <sup>2</sup> (%) |       |      |      |
| Offspring (T)       | 1.9           | 442       | X-3                     | HMS3          | 51.3     | 44.1              | 56.1              | -11.5  | 6.0                | 51.3     | 10.1 | -12.5  | 8.1                | 20.2               |       |      |      |
|                     |               |           |                         | HMS4          | -        | -                 | -                 | -      | -                  | 98.7     | 1.3  | -4.7   | 2.6                | 6.5                |       |      |      |
|                     |               |           | 2                       | HMS5          | 129.4    | 120.6             | 130.0             | -6.9   | 1.9                | 129.4    | 3.3  | -7.4   | 3.5                | 8.7                |       |      |      |
|                     |               |           |                         | HMS6          | 25.5     | 24.8              | 28.6              | 19.8   | 17.9               | 25.5     | 19.3 | 18.2   | 19.9               | 49.6               |       |      |      |
|                     |               |           | HMS3 × HMS4             | HMS8          | 59.3     | 47.2              | 70.7              | 8.1    | 2.8                | 59.3     | 3.3  | 8.1    | 6.0                | 15.0               |       |      |      |
|                     |               |           |                         | HMS3 × HMS6   | -        | -                 | -                 | -      | -                  | -        | -    | 1.9    | 5.3                | 1.0                | -     |      |      |
|                     |               |           | <b>Sum</b>              | -             | -        | -                 | -                 | -      | -                  | -        | 2.1  | 5.2    | 1.2                | -                  | -     |      |      |
|                     |               |           | Log <sub>10</sub> (T+1) | 2.2           | 459      | X-3               | HMS3              | 49.3   | 43                 | 54.8     | -0.2 | 6.3    | 46.3               | 27.7               | -0.28 | 10.6 | 16.8 |
|                     |               |           |                         |               |          |                   | HMS4              | 95.9   | 83.2               | 109.8    | -0.1 | 1.2    | 90.9               | 13.5               | -0.21 | 7.4  | 11.7 |
|                     |               |           |                         |               |          | 2                 | HMS5              | 129.4  | 120.7              | 130      | -0.1 | 1.2    | 129.4              | 4.5                | -0.09 | 2.1  | 3.3  |
| HMS6                | 25.5          | 24.6      |                         |               |          |                   | 29.1              | 0.4    | 15.9               | 28.5     | 44.0 | 0.37   | 28.8               | 45.6               |       |      |      |
| HMS3 × HMS4         | HMS7-1        | 37.3      |                         |               |          | 37.3              | 38.4              | 0.5    | 37.2               | -        | -    | -      | -                  | -                  | -     |      |      |
|                     | HMS8          | 51.3      |                         |               |          | 47.3              | 60.6              | 0.2    | 4.2                | 53.3     | 16.5 | 0.23   | 14.2               | 22.5               |       |      |      |
| HMS3 × HMS6         | HMS3 × HMS4   | -         |                         |               |          | -                 | -                 | -      | -                  | -        | -    | 16.6   | 0.22               | 6.8                | -     |      |      |
|                     | HMS4 × HMS5   | -         |                         |               |          | -                 | -                 | -      | -                  | -        | -    | 2.5    | -                  | 1.0                | -     |      |      |
| HMS3 × HMS6         | HMS3 × HMS6   | -         |                         |               |          | -                 | -                 | -      | -                  | -        | -    | 0.069  | -                  | -                  | -     |      |      |
|                     | HMS5 × HMS6   | -         |                         |               |          | -                 | -                 | -      | -                  | -        | -    | 20.1   | 0.20               | 5.0                | -     |      |      |
| HMS4 × HMS8         | HMS4 × HMS6   | -         | -                       | -             | -        | -                 | -                 | -      | 1.4                | 0.050    | 1.3  | -      |                    |                    |       |      |      |
|                     | HMS6 × HMS8   | -         | -                       | -             | -        | -                 | -                 | -      | 11.6               | 0.20     | 6.2  | -      |                    |                    |       |      |      |
| <b>Sum</b>          | -             | -         | -                       | -             | -        | -                 | -                 | 6.7    | 0.14               | 2.0      | -    | -      |                    |                    |       |      |      |
| Binary (T)          | 2.0           | 442       | X-3                     | HMS3          | 47.3     | 41.5              | 52.6              | -0.1   | 6.0                | 47.3     | 30.4 | -0.13  | 8.8                | 14.5               |       |      |      |
|                     |               |           |                         | HMS4          | 105.7    | 96.7              | 112.7             | -0.1   | 4.2                | 105.7    | 47.6 | -0.12  | 5.7                | 9.4                |       |      |      |
|                     |               |           | 2                       | HMS6          | 24.8     | 24.3              | 26.4              | 0.2    | 13.4               | 23.3     | 17.6 | 0.098  | 12.8               | 21.1               |       |      |      |
|                     |               |           |                         | HMS7-2        | 42.8     | 41.2              | 45.8              | 0.2    | 10.4               | 43.8     | 21.8 | 0.25   | 33.5               | 55.1               |       |      |      |
|                     |               |           | HMS3 × HMS4             | HMS3 × HMS4   | -        | -                 | -                 | -      | -                  | -        | -    | 48.1   | 0.13               | 7.4                | -     |      |      |
|                     |               |           |                         | HMS3 × HMS6   | -        | -                 | -                 | -      | -                  | -        | -    | 24.2   | 0.13               | 6.6                | -     |      |      |
|                     |               |           | HMS4 × HMS6             | HMS4 × HMS6   | -        | -                 | -                 | -      | -                  | -        | -    | 16.3   | -0.11              | -4.8               | -     |      |      |
|                     |               |           |                         | HMS3 × HMS6   | -        | -                 | -                 | -      | -                  | -        | -    | 1.9    | -                  | -1.0               | -     |      |      |
|                     |               |           | HMS4 × HMS7-2           | HMS4 × HMS7-2 | -        | -                 | -                 | -      | -                  | -        | -    | 50.8   | 0.029              | 22.6               | -     |      |      |
|                     |               |           |                         | <b>Sum</b>    | -        | -                 | -                 | -      | -                  | -        | -    | 34.0   | 0.25               | 91.6               | 100   |      |      |
| Sex ratio (k)       | 2.0           | 227       | X-3                     | D5            | 54.7     | 44.2              | 72.9              | 2.4    | 1.4                | 52.7     | 0.3  | 0.015  | 1.8                | 2.8                |       |      |      |
|                     |               |           |                         | D6            | 130.0    | 129.9             | Rt tip            | 14.2   | 54.2               | 130.0    | 29.6 | 0.13   | 49.1               | 76.7               |       |      |      |
|                     |               |           | 2                       | S3            | -        | -                 | -                 | -      | -                  | -        | -    | 18.6   | 2.4                | 0.037              | 5.2   | 8.1  |      |
|                     |               |           |                         | S4            | 44.8     | 38.8              | 52                | 5.1    | 4.7                | 43.8     | 6.2  | 0.052  | 7.9                | 12.3               |       |      |      |
|                     |               |           | D5 × S3                 | D5 × S3       | -        | -                 | -                 | -      | -                  | -        | -    | 1.3    | 0.032              | 1.6                | -     |      |      |
|                     |               |           |                         | D6 × S4       | -        | -                 | -                 | -      | -                  | -        | -    | 2.6    | 0.040              | 12.4               | -     |      |      |
|                     |               |           | <b>Sum</b>              | -             | -        | -                 | -                 | -      | -                  | -        | 60.3 | -      | 78.0               | 100                |       |      |      |

<sup>1</sup>CI-L and CI-R: the left and right positions of the 95% confidence intervals
